# Supplementary material for: Exploring extreme event attribution by using long-running meteorological observations
Source: Copernicus journal article supplement (doi:10.5194/egusphere-2023-2879), 2023-12-15
Supplement: Supplementary file [file egusphere-2023-2879-AC2-supplement.pdf]

# Response to referee 2

<https://doi.org/10.5194/egusphere-2023-2879-RC2>

We thank referee 2 for taking the time to assess our manuscript and providing valuable feedback. In this document, we have included said feedback along with our responses in blue.

For two classes of weather events – the frequency of extremely hot days and the maximum 1-day precipitation accumulation - this paper compares the estimated fraction of risk attributable (FAR) to climate change using two approaches to event attribution: first by estimating exceedance probabilities in 30-year time slices representing the factual and counterfactual climates, which are assumed to be stationary, at individual stations; and then using a nonstationary trend fitted to a spatial average computed from gridded data products. Both methods are found to produce relatively similar results for the FAR of the number of very hot days, while the FAR for extreme precipitation is found to be somewhat variable, particularly in the station data.

The paper is clearly written, and the discussion around potential homogeneity issues in the station observations is a useful and important one. However, it's not entirely clear to me what the purpose of the comparison is here, or what the overall conclusions should be. This is perhaps because one method is used with station data, and another with gridded data, so it's hard to understand whether differences in the results arise from the dataset or the method used: I think this could be a really useful comparison if both methods were used with both station and gridded data.

## 1 General comments

The nonstationary method used here seems to only use 30 years of recent data to estimate the covariate  $\beta$  describing the strength of the relationship between the extreme and GMST (lines 114-115). This is a very short time series: usually in WWA studies we would use as much data as possible to estimate this parameter, partly because a large sample size is usually needed to get stable estimates of the model parameters and partly to reduce the risk of conflating the GMST trend with decadal variability. I would suggest using longer time series to fit the trends, which would give a really useful and interesting comparison of whether the linear regression really captures the changes between the two snapshots. If that's not possible due to data availability, you should highlight that only 30 years of data were used to estimate the nonstationary model parameters, and discuss what the implications might be.

This is an important point, and we understand the need to further explain why we've chosen to compute the regression over the 30-year periods for the gridded data. As is also mentioned in the response to the specific comment concerning this topic (Figure A7/A8), we will update parts of the analysis of the station data. Specifically, we will extend the period over which the regression to GMST is computed before shifting/scaling the distribution based on station data of the current period.

A GEV or Gumbel distribution is used to model block maxima/minima: there's no theoretical basis on which to use them to model  $tx_{ge25}$ , which is a count variable. To simplify the statistical modelling, I'd suggest looking at maximum temperatures instead; if that's not feasible, you could try fitting a nonstationary Gaussian distribution to the log of the counts.

You are correct in that there is no theoretical basis to model count data with GEV or Gumbel. We've employed a Kolmogorov-Smirnov test (KS-test) to make sure that the distributions represent the underlying data. Regarding the index, we have opted to use the  $tx_{ge25}$  index since this (much) better captures the severity of the summer of 2018 in Sweden. For an index like  $T_{max}$ , a summer of 2018 is not unlikely, but in terms of  $tx_{ge25}$  it is essentially unprecedented. We will expand our reasoning on the event definition in the section on climate indicators.

My understanding is that, since both  $p_0$  and  $p_1$  are nonnegative, the FAR can never be greater than 1 (equation 2): however, in both Figures 5 and 7 it looks as though FARs above 1 occur, although the axes are truncated at 1 so it's hard to see. Please check this, and also modify the axes so that the upper bounds of the confidence intervals are visible.

Your understanding is correct. FAR above one does not occur in the data making up the figures, but we agree that it can seem this way due to the truncation. It is also worth noting that these distributions are very skewed in some cases. We will update the figures and extend the x-axis to make this clear.

## 2 Specific comments

Abstract: I find the terminology here a little vague: it's not clear what is meant by 'the reference method' and, since both methods use observations of some sort, this doesn't help to understand which is which. It would be useful to add a line explaining that the 'widely adopted' method uses a transient/nonstationary model, and rather than referring to the 'analogue approach' (which is becoming synonymous with another method), I would perhaps refer to a factual/counterfactual comparison.

We will update how we describe the methods to be more precise.

46, 52: The reader doesn't know what 'the reference method' is yet, or 'shifting and scaling' – this needs some introduction.

Good catch. We will change this.

62-63 & 67-68: The rapid attribution method could also be used on the long-running meteorological observations, so I think it would be useful to distinguish more clearly between the two methods: maybe 'we will also perform an analysis based on directly comparing the current and preindustrial periods in data from several stations with long observational records'. Also some repetition here, so 61-63 could be removed altogether.

This is a good suggestion.

77: This should be more precisely defined:  $p_1$  and  $p_0$  are the probabilities of observing an event of equal or greater magnitude than some threshold value in the factual (current) and counterfactual (preindustrial) climates ('exceedance probabilities').

We agree, thanks.

80. I found this a bit unclear – maybe 'FAR describes the proportion of events of the same (or greater) magnitude that can be attributed to the forced change'?

Also a good suggestion, thanks.

84. Change to 'The exceedance probability'

Will do.

88-96. I don't think I've seen examples of climate models being used to estimate  $p_0$ , although they are certainly used to estimate probability ratios. I'd suggest moving this paragraph to the description of the datasets

This is about explaining the background as to why the current methods, for instance GMST shifting, are used. One could, for example, use the pre-industrial control run of a GCM as a historical snapshot, similar to how we are using station data in this study, to remove the dependence of the regression to GMST.

101-2. Not all distributions have these three parameters: to make this more general, I'd remove this line and simply say that 'the mean  $\mu$ ' is shifted following...

This is a good point.

105. ' $\mu$  and the standard deviation  $\sigma$  are...'

Thanks.

112-128. This breaks up the flow a bit – I'd move this (and maybe 88-96) into a separate subsection on datasets.

Good suggestion. We will move this to a new subsection.

Figure 1. This was quite hard to read in black & white, could you change the colour scheme to something more colourblind-friendly?

We will update this figure so that the lines representing the factual and counterfactual worlds also use different line styles, in addition to different colours.

129-130. The WWA approach outlined in Philip et al. (2020) uses maximum likelihood

estimation to estimate the parameters of a nonstationary GEV distribution directly from (3-5), rather than first fitting a linear regression to estimate the trend and then estimating the parameters of a stationary GEV separately. I wouldn't expect this to make much difference to the overall conclusions but this should be checked and commented on – you can fit the nonstationary GEV distributions using the online Climate Explorer tool provided by KNMI (first upload the time series, then choose the 'trends in return times of extremes' option).

These are very valuable insights, especially since it touches upon something we were unable to deduce from Philip et al. (2020). We will add a comment on this in the paper.

It would also be useful to be clearer about which time period was used for the regression and parameter estimation – and, if only 30 years is used, this would be a good opportunity to discuss the implications of using a relatively short time series.

Since this connected to one of the general comments, we refer to that one for the reply. But in general, we will elaborate on our reasoning behind the choice of time periods.

131. How was this 95% interval estimated?

The regression to GMST is computed using the python package statsmodels. The returned confidence interval is based on the Student's t-distribution.

141-2. Does this mean that the spread of all members was used to determine the confidence bounds? How was this done – was a parametric distribution used, or order statistics?

Yes, for CORDEX we used the spread from all ensemble members with an acceptable trend (see previous comment). We computed the quantiles directly (order statistics) on the resulting FAR ensemble.

158-9. Why was stationarity checked, and over which period? I can see the advantage of checking that each of the time periods studied could be treated as locally stationary, but as written, this could be read as suggesting that the full series was found to be stationary.

Here it is the two separate time periods that are checked for stationarity, and we should be more clear on this. This is used in the reasoning around if the data should be detrended or not (L.245-246).

175-7. You could add a line to explain why this is: the GEV with negative shape parameter has a finite upper bound, which can lead to observed events becoming theoretically impossible in the shifted/scaled distribution. The Gumbel distribution, which has its shape parameter fixed at zero, has no upper limit and so does not exhibit this behaviour.

This is very useful. Thank you.

178-9. As noted above, a Gumbel distribution isn't theoretically justified for count data like txge25.

Since this is part of a general comment, we refer to that one for our reply.

189. Please add a line interpreting this FAR in terms of the number of hot days.

Will do.

191. How are percentiles of the FAR computed? Also, this notation is slightly confusing, because  $p_0$  and  $p_1$  have already been used to denote exceedance probabilities. Percentiles could perhaps be relabelled as  $Q_5$ .

We agree that the notation can be confusing here, and relabel it as  $Q_5$  is a good suggestion. Percentiles/quantiles are computed directly (order statistics) on the 1000 FAR values resulting from the bootstrap.

Figure 4. I would expect the size of the circles to represent a range of values - it's not clear exactly what they refer to here.

The size of the circles here represent the range between the 95th and 5th percentile of FAR, essentially the uncertainty. We will improve the explanation of this in the figure caption.

213-4. Why are  $P_5$  and  $P_{25}$  given here, rather than an upper and lower limit?

For an attribution study, we reason that the lower limits of the confidence interval are more interesting, it is here we determine if the event can be attributed or not. But we agree that presenting these and at the same time discussing the spread is confusing, so we will add the upper limits of the confidence interval as well.

Figure 5 & 7. I don't understand how the FAR is greater than one in some of these cases – perhaps some additional scaling has been applied? Please extend the x-axis to show the upper bounds of the confidence intervals. It would also be useful to add a vertical line at 0, highlighting the critical threshold for evidence of an effect.

See the reply to the general comment on the same topic.

236-240. You could also discuss the fact that observations of precipitation are typically more variable than observations of temperatures; and that gridded data, by its very nature, will not tend to contain such extreme extreme values as a single station, which may result in a better constrained distribution. When trying to fit a distribution to only 30 years of data we don't really expect to get an accurate estimate of the return level of any events with a return period of greater than 30 years (or, conversely, an accurate estimate of the return period of particularly extreme events): this may also lead to inflated estimates of the return period, which can in turn make the PR and FAR estimates unstable.

This is very valuable input. We will extend this discussion to include a part on the variability of precipitation and how it is not necessarily represented in gridded data.

251-258. I think this could fit better in section 2.3, where the climate indicators are introduced.

We will move this to 2.3

259-262. This discussion of spatial variability in the trend is really interesting and could be referred to in the discussion of variation between the stations – I’d like to see Figure A1 in the main text, perhaps with the station regression coefficients overlaid so that the similarities/differences between the gridded product and the stations are really clear.

This is a good suggestion. We will try to combine Figure A1 and A2 and see how this could fit into the main text.

292. You could mention that attribution of extreme precipitation events is known to be sensitive to the event definition, both in terms of the spatial domain and the duration of the event.

Agree.

294-5. I think that most studies would try to use homogenised data, where available: you could frame this instead as highlighting the importance of using homogenised data.

Good point.

296-299. The conclusions concerning the two different methods are rather weak, perhaps because it was never very clear what the purpose of the comparison actually is. Gridded datasets offer an invaluable opportunity to examine spatial variability in trends and FAR over a whole region, but should be validated against station data if possible to ensure that they are locally accurate. However, it’s hard to get a sense of their relative merits here because two different methods have also been used, so there’s very little common ground for comparison.

We completely agree that gridded datasets are an invaluable asset when it comes to attribution studies. The purpose of this study is not to evaluate the use of gridded data, but the evaluation of retrieving FAR/PR by shifting/scaling a distribution of “current” data according to its regression to GMST. To achieve this, we wanted to retrieve FAR while staying as close to the data as possible (e.g. avoiding regressions), and compare this to the traditional approach. Since generally, gridded data before ~1960 is uncommon, and long-running observations are available, we opted to use these. So it is not possible to apply the method we’ve used on the station data to the gridded data, since these don’t provide the pre-industrial snapshot. Furthermore, we will improve how the GMST shifted method is applied to station data, see reply to the comment about figure A7/A8. Overall, based on this feedback, we realise that we need to clarify that the purpose of the study is to evaluate/explore the GMST shifted method, not the use of gridded data.

299. CC-scaling has not yet been defined.

Good catch, thanks.

Figure A7/A8. I don’t quite understand what these figures show. Is it the case that the upper bar shows the FAR computed from  $p_0$  and  $p_1$  computed from stationary distributions corresponding to the historical and current periods; while the second bar (shaded) shows the FAR based on a linear regression estimated over the ‘current’ climate only?

Given that the shorter time periods have been tested for stationarity, and no trend signal could be detected, it's not surprising that the confidence intervals of the hatched bars all include zero. A fairer and more useful comparison would be to estimate the regression coefficients over the whole period, to see whether the regression model adequately captures the observed difference between the two 30-year slices.

You seem to be interpreting the figures correctly. The upper bar of a pair shows the FAR based on current and pre-industrial data, using no regression to GMST. The lower bar of a pair shows the FAR computed using only the current period, relying on the shifted/scaled distribution to compute  $p_0$ . Your point about computing the regression over only the stationary period is very valuable, and we will remake the analysis behind this plot and make use of a longer period for calculating the regression.
